# Supplementary material
Source: Springer Nature journal article supplement (https://www.springermedizin.de/resource/supplementary/13229_2012_37_MOESM1_ESM.pdf/9676066)
Supplement: MOESM1 [file 9676066]

## Additional Material files

**Additional File 1:** List of all SNPs genotyped and their genotypic associations with tactile sensitivity as measured using the parent-report Short Sensory Profile (SSP) and a behavioral touch test. \* denotes significant level of  $p \leq .05$

| Gene variations | SSP tactile score<br>$\chi^2$ statistic | SSP tactile score<br>p-value | Touch test<br>$\chi^2$ statistic | Touch test<br>p-value |
|-----------------|-----------------------------------------|------------------------------|----------------------------------|-----------------------|
| rs11636966      | 10.77                                   | .004*                        | 10.18                            | .006*                 |
| rs8023959       | 4.32                                    | .03*                         | 4.70                             | .02*                  |
| rs2162241       | 5.68                                    | .05*                         | 7.07                             | .02*                  |
| rs7179514       | 10.82                                   | .004*                        | 4.69                             | .09                   |
| rs17117279      | 7.75                                    | .02*                         | 1.72                             | .42                   |
| rs7171512       | 5.72                                    | .05*                         | .91                              | .63                   |
| rs737098        | 2.73                                    | .25                          | 17.75                            | .0001**               |
| rs1367959       | 4.43                                    | .10                          | 13.13                            | .001*                 |
| rs1426224       | .13                                     | .71                          | 9.78                             | .001*                 |
| rs3212331       | 3.40                                    | .18                          | 11.68                            | .002*                 |
| rs8026392       | 1.42                                    | .48                          | 11.71                            | .002*                 |
| rs11161329      | 3.02                                    | .21                          | 7.29                             | .02*                  |
| rs12905535      | 3.88                                    | .14                          | 7.42                             | .02*                  |
| rs6576602       | 1.34                                    | .51                          | .01                              | .92                   |
| rs2114485       | 1.62                                    | .44                          | 4.69                             | .09                   |
| rs1426217       | 3.46                                    | .17                          | .36                              | .83                   |
| rs1432007       | 1.56                                    | .45                          | 1.84                             | .39                   |
| rs10519563      | 1.47                                    | .22                          | 1.11                             | .57                   |
| rs1248141       | 5.23                                    | .07                          | .13                              | .71                   |
| rs2873027       | .92                                     | .63                          | .05                              | .97                   |
| rs9806546       | .21                                     | .90                          | .15                              | .92                   |
| rs12593579      | 1.36                                    | .50                          | 1.48                             | .22                   |
| rs80838471      | 2.78                                    | .24                          | 4.76                             | .09                   |
| r10873636       | 3.43                                    | .17                          | 2.95                             | .22                   |
| rs11631940      | 1.09                                    | .57                          | .56                              | .75                   |

|            |      |     |      |     |
|------------|------|-----|------|-----|
| rs12593482 | 2.88 | .14 | .66  | .71 |
| rs1549482  | 1.18 | .55 | 4.69 | .09 |
| rs17646555 | 2.38 | .30 | .56  | .75 |
| rs7165604  | .22  | .63 | .71  | .45 |
| rs7180158  | 1.12 | .56 | .16  | .68 |
| rs890317   | 3.52 | .17 | 4.17 | .12 |
| rs12437672 | .91  | .63 | 1.25 | .53 |
| rs12440905 | .35  | .55 | .49  | .48 |
| rs12442889 | 2.94 | .22 | 2.50 | .28 |
| rs21315904 | .10  | .75 | .09  | .75 |
| rs7178713  | 3.65 | .16 | 4.58 | .10 |
| rs1863456  | 2.83 | .24 | 3.90 | .13 |
| rs4906896  | .92  | .62 | .01  | .90 |
| rs7174437  | .02  | .86 | .24  | .62 |
| rs1582760  | 2.43 | .29 | 1.76 | .44 |
| rs1863455  | .72  | .69 | 3.18 | .20 |
| rs1035751  | .96  | .32 | .14  | .70 |
